# Supplementary material for: Cobalt-catalyzed nucleophilic addition of the allylic C(sp3)–H bond of simple alkenes to ketones
Source: publisher site journal article supplement (doi:10.3762/bjoc.14.176), 2018-08-02

# **Supporting Information**

**for**

## **Cobalt-catalyzed nucleophilic addition of the allylic C(sp<sup>3</sup>)-H bond of simple alkenes to ketones**

Tsuyoshi Mita\*, Masashi Uchiyama, Kenichi Michigami and Yoshihiro Sato\*

Address: Faculty of Pharmaceutical Sciences, Hokkaido University, Sapporo 060-0812, Japan

Email: Tsuyoshi Mita: [tmita@pharm.hokudai.ac.jp](mailto:tmita@pharm.hokudai.ac.jp); Yoshihiro Sato: [biyo@pharm.hokudai.ac.jp](mailto:biyo@pharm.hokudai.ac.jp)

\*Corresponding author

### **Experimental details and characterization data**

## Table of Contents

|     |                                                                         |    |
|-----|-------------------------------------------------------------------------|----|
| (A) | General                                                                 | S3 |
| (B) | Materials and methods                                                   | S3 |
|     | (B-1) Availability of ketones                                           | S3 |
|     | (B-2) Preparation of alkenes                                            | S3 |
| (C) | General procedure for allylic C(sp <sup>3</sup> )-H addition to ketones | S4 |
|     | (C-1) Examination of ketone electrophiles                               | S4 |
|     | (C-2) Examination of alkenes                                            | S7 |
| (D) | Copies of <sup>1</sup> H NMR and <sup>13</sup> C NMR spectra            | S9 |

## (A) General

All manipulations were carried out under an atmosphere of argon or nitrogen unless otherwise noted. Infrared (IR) spectra were recorded on a JASCO FT/IR 460 Plus Fourier transform infrared spectrophotometer. NMR spectra were recorded on a JEOL ECA-500 spectrometer, operating at 500 MHz ( $^1\text{H}$ ) or 125 MHz ( $^{13}\text{C}$ ). Chemical shifts in  $\text{CDCl}_3$  were reported in the scale relative to  $\text{CHCl}_3$  (7.26 ppm) for  $^1\text{H}$  NMR, and to  $\text{CDCl}_3$  (77.0 ppm) for  $^{13}\text{C}$  NMR as internal references, respectively. NMR data are reported as follows: chemical shifts, multiplicity (s: singlet, d: doublet, t: triplet, q: quartet, m: multiplet, br: broad signal), coupling constant (Hz), and integration. EI-HRMS and ESI-HRMS spectra were measured on a JEOL JMS-T100GCv and Thermo Scientific Exactive, respectively. Gel permeation chromatography was performed on HPLC LC-9201 (Japan Analytical Industry Co., Ltd). Column chromatography was performed with Wakogel<sup>®</sup> FC-40 (20–40  $\mu\text{m}$ , spherical, neutral). DMA was distilled from  $\text{CaH}_2$ .  $\text{AlMe}_3$  (2.0 M in toluene) was purchased from Sigma-Aldrich Co. LLC.  $\text{Co}(\text{acac})_2$  and Xantphos were purchased from Tokyo Kasei, Co., Ltd.

## (B) Materials and methods

### (B-1) Availability of ketones

Acetophenone (**2a**) was purchased Nacalai Tesque. Inc. 4'-Methylacetophenone (**2b**) was purchased from Wako Pure Chemical Industries, Ltd. 4'-Methoxyacetophenone (**2c**) and 2-naphthophenone (**2f**) were purchased from Tokyo Kasei, Co., Ltd. 4'-Fluoroacetophenone (**2d**) was purchased from Sigma-Aldrich Co. LLC. Methyl 4-acetylbenzoate (**2e**) was purchased from Acros Organics Inc. Propiophenone (**2g**) was purchased from Kanto Chemical Co., Inc. All ketones except **2e** and **2f** were purified by distillation before use. **2e** and **2f** were used as received.

### (B-2) Preparation of alkenes

1-Undecene (**1a**) and 1-octadecene (**1b**) were purchased from Tokyo Kasei, Co., Ltd and used after distillation. 6-Phenyl-1-hexene (**1c**) was prepared according to the reported procedure.<sup>1</sup>

---

<sup>1</sup> Krishna, P. R.; Srinivas, R. *Tetrahedron Lett.* **2007**, 48, 2013.

## (C) General procedure for allylic C(sp<sup>3</sup>)-H addition to ketones

### (C-1) Examination of ketone electrophiles

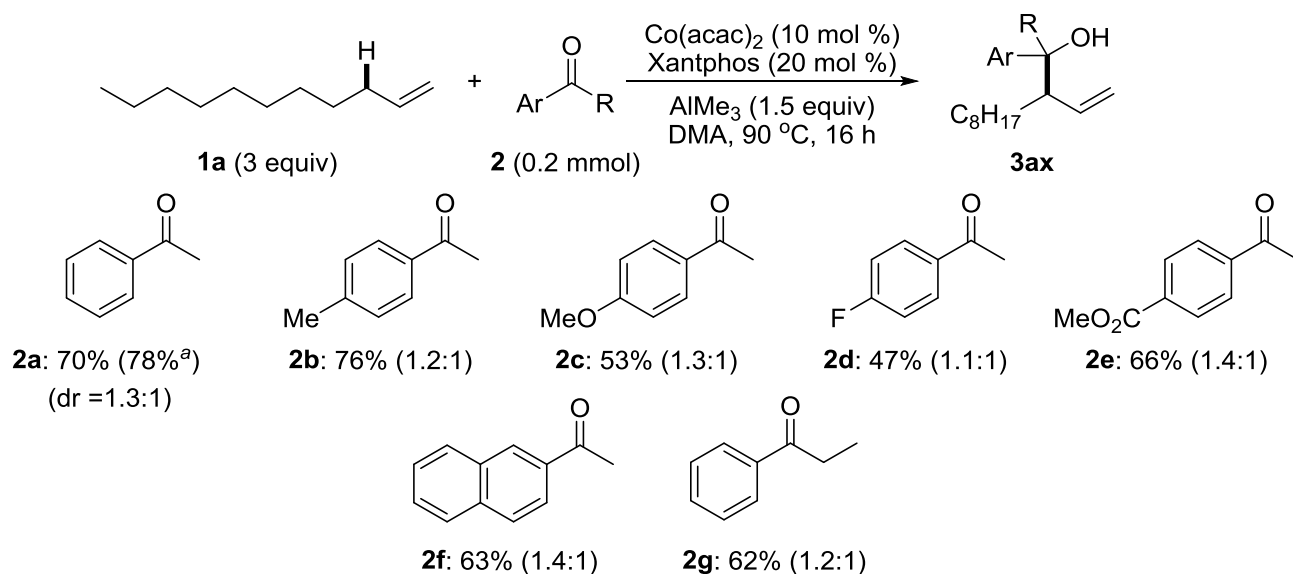

<sup>a</sup>With 1 mmol of **2a**.

To an oven-dried test tube was placed Co(acac)<sub>2</sub> (5.2 mg, 20 μmol, 10 mol %) and Xantphos (23.1 mg, 40 μmol, 20 mol %) in DMA (2 mL). The resulting mixture was stirred at room temperature until the materials had been completely dissolved. After the solution had been cooled to 0 °C, it was stirred for 1 minute, and then AlMe<sub>3</sub> (2 M in toluene, 0.15 mL, 0.3 mmol, 1.5 equiv) was added. The dark green solution was stirred for another 1 minute, and then 1-undecene (**1a**, 0.6 mmol, 120 μL, 3.0 equiv) was added followed by the addition of ketone **2** (0.2 mmol, 1.0 equiv). The resulting mixture was stirred at 90 °C for 16 h. After cooling the mixture to 0 °C, the reaction was quenched by 1 M HCl aq and extracted with ethyl acetate (3 times). The combined organic layer was washed with brine and dried over Na<sub>2</sub>SO<sub>4</sub>. After the solids had been filtered off, the solvent was removed under reduced pressure and the residue was dried under vacuum to afford the crude mixture. The approximate yield of **3ax** was determined at this stage using 1,1,2,2-tetrachloroethane (δ = 6.1 ppm in CDCl<sub>3</sub>, 2H) as an internal standard. If ketone **2** remained, NaBH<sub>4</sub> was added to convert it into the corresponding alcohol, which could be easily separated from **3ax** by silica-gel column chromatography. It was then purified by silica-gel column chromatography to afford the product **3ax**.

**2-Phenyl-3-vinylundecan-2-ol (3aa):** **1a** (120 μL, 0.6 mmol, 3.0 equiv) and **2a** (23 μL, 0.2 mmol, 1.0 equiv) were employed as starting materials. Purification of the crude product by silica-gel column chromatography (eluent: hexane/ethyl acetate, 20:1) afforded **3aa** as colorless oil (38.5 mg, 140 μmol, 70%, dr = 1.3:1). Preparative scale synthesis: **1a** (600 μL, 3 mmol, 3.0 equiv), **2a** (117 μL, 1 mmol, 1.0 equiv), Co(acac)<sub>2</sub> (25.7 mg, 0.1 mmol, 10 mol %), Xantphos (115.7 mg, 0.2 mmol, 20 mol %), and AlMe<sub>3</sub> (2 M in toluene, 0.75 mL, 1.5 mmol, 1.5 equiv) were used in DMA (10 mL). Purification of the crude product by silica-gel column chromatography (eluent: hexane/ethyl acetate, 20:1) afforded **3aa** as colorless oil (215.1 mg, 0.784 mmol, 78%, dr = 1.3:1).

IR (neat): 3467, 2925, 2855, 1637, 1446, 1375, 1065, 913, 759, 701 cm<sup>-1</sup>; <sup>1</sup>H NMR (400 MHz, CDCl<sub>3</sub>) δ: 7.44-7.21 (m, 5H), 5.63-5.52 (m, 1H), 5.21-5.01 (m, 2H), 2.30-2.23 (m, 1H), 1.53/1.51 (s, 3H), 1.26-1.06

(m, 14H), 0.85 (t,  $J = 7.1$  Hz, 3H) ppm;  $^{13}\text{C}$  NMR (100 MHz,  $\text{CDCl}_3$ )  $\delta$ : 147.2, 146.5, 138.9, 138.6, 127.84, 127.75, 126.6, 126.3, 125.9, 125.2, 118.8, 118.1, 76.0, 75.5, 56.6, 55.6, 31.8, 29.42, 29.41, 29.37, 29.2, 28.9, 28.6, 28.4, 27.8, 27.7, 25.4, 22.6, 14.1 ppm; HRMS (EI)  $m/z$  calcd. for  $\text{C}_{19}\text{H}_{28} [\text{M}-\text{H}_2\text{O}]^+$ : 256.2191, found: 256.2191.

**2-(*p*-Tolyl)-3-vinylundecan-2-ol (3ab):** **1a** (120  $\mu\text{L}$ , 0.6 mmol, 3.0 equiv) and **2b** (27  $\mu\text{L}$ , 0.2 mmol, 1.0 equiv) were employed as starting materials. Purification of the crude product by silica-gel column chromatography (eluent: hexane/ethyl acetate, 100:1 to 20:1) afforded **3ab** as colorless oil (44 mg, 153  $\mu\text{mol}$ , 76%, dr = 1.2:1). IR (neat): 3466, 2925, 2855, 1637, 1512, 1457, 1374, 1078, 912, 817  $\text{cm}^{-1}$ ;  $^1\text{H}$  NMR (400 MHz,  $\text{CDCl}_3$ )  $\delta$ : 7.31/7.26 (d,  $J = 8.3$  Hz, 2H), 7.14 (d,  $J = 8.3$  Hz, 2H), 5.63-5.52 (m, 1H), 5.21-5.03 (m, 2H), 2.34 (s, 3H), 2.27-2.22 (m, 1H), 1.51/1.49 (s, 3H), 1.25-1.06 (m, 14H), 0.85 (t,  $J = 7.0$  Hz, 3H) ppm;  $^{13}\text{C}$  NMR (100 MHz,  $\text{CDCl}_3$ )  $\delta$ : 144.2, 143.6, 139.1, 138.7, 136.1, 135.8, 128.54, 128.46, 125.8, 125.1, 118.7, 117.9, 75.8, 75.3, 56.6, 55.6, 31.8, 29.45, 29.43, 29.42, 29.39, 29.2, 28.9, 28.7, 28.5, 27.8, 27.7, 25.4, 22.6, 20.94, 20.91, 14.1 ppm; HRMS (EI)  $m/z$  calcd. for  $\text{C}_{20}\text{H}_{30} [\text{M}-\text{H}_2\text{O}]^+$ : 270.2348, found: 270.2349.

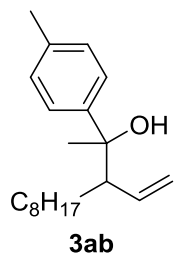

**2-(4-Methoxyphenyl)-3-vinylundecan-2-ol (3ac):** **1a** (120  $\mu\text{L}$ , 0.6 mmol, 3.0 equiv) and **2c** (27.5 mg, 0.2 mmol, 1.0 equiv) were employed as starting materials. Purification of the crude product by silica-gel column chromatography (eluent: hexane/ethyl acetate, 50:1) afforded **3ac** as colorless oil (29 mg, 96  $\mu\text{mol}$ , 53%, dr = 1.3:1). IR (neat): 3466, 2925, 2854, 1611, 1510, 1248, 1179, 1036, 912, 832  $\text{cm}^{-1}$ ;  $^1\text{H}$  NMR (400 MHz,  $\text{CDCl}_3$ )  $\delta$ : 7.35 (d,  $J = 8.5$  Hz, 1H), 7.29 (d,  $J = 8.5$  Hz, 1H), 6.86 (d,  $J = 8.5$  Hz, 2H), 5.61-5.52 (m, 1H), 5.22-5.03 (m, 2H), 3.81 (s, 3H), 2.26-2.20 (m, 1H), 1.51/1.49 (s, 3H), 1.26-1.00 (m, 14H), 0.85 (t,  $J = 7.0$  Hz, 3H) ppm;  $^{13}\text{C}$  NMR (100 MHz,  $\text{CDCl}_3$ )  $\delta$ : 158.2, 158.0, 139.3, 139.1, 138.7, 127.1, 126.4, 118.8, 118.0, 113.1, 113.0, 75.7, 75.2, 56.8, 55.8, 55.2, 31.84, 31.82, 29.5, 29.4, 29.2, 28.82, 28.79, 28.5, 27.8, 27.7, 25.3, 22.6, 14.1 ppm; HRMS (EI)  $m/z$  calcd. for  $\text{C}_{20}\text{H}_{30}\text{O} [\text{M}-\text{H}_2\text{O}]^+$ : 286.2297, found: 286.2292.

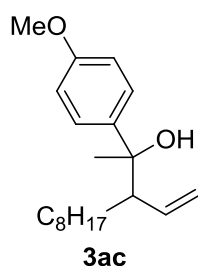

**2-(4-Fluorophenyl)-3-vinylundecan-2-ol (3ad):** **1a** (120  $\mu\text{L}$ , 0.6 mmol, 3.0 equiv) and **2d** (25.7 mg, 0.2 mmol, 1.0 equiv) were employed as starting materials. Purification of the crude product by silica-gel column chromatography (eluent: hexane/ethyl acetate, 20:1 to 10:1) afforded **3ad** as colorless oil (26 mg, 88  $\mu\text{mol}$ , 47%, dr = 1.1:1). IR (neat): 3466, 2926, 2855, 1603, 1509, 1226, 1161, 1077, 915, 837  $\text{cm}^{-1}$ ;  $^1\text{H}$  NMR (400 MHz,  $\text{CDCl}_3$ )  $\delta$ : 7.41-7.31 (m, 2H), 7.04-6.98 (m, 2H), 5.60-5.50 (m, 1H), 5.23-5.03 (m, 2H), 2.25-2.18 (m, 1H), 1.56 (s, 1H), 1.52/1.50 (s, 3H), 1.29-1.00 (m, 14H), 0.86 (t,  $J = 7.0$  Hz, 3H) ppm;  $^{13}\text{C}$  NMR (100 MHz,  $\text{CDCl}_3$ )  $\delta$ : 161.7 (d,  $J_{\text{CF}} = 248$  Hz), 161.5 (d,  $J_{\text{CF}} = 249$  Hz), 142.9 (d,  $J_{\text{CF}} = 2.8$  Hz), 142.3 (d,  $J_{\text{CF}} = 2.9$  Hz), 138.8, 138.3, 127.6 (d,  $J_{\text{CF}} = 7.6$  Hz), 126.9 (d,  $J_{\text{CF}} = 7.6$  Hz), 119.2, 118.3, 114.52 (d,  $J_{\text{CF}} = 21$  Hz), 114.46 (d,  $J_{\text{CF}} = 22$  Hz), 75.7, 75.2, 56.8, 55.7, 31.8, 29.42, 29.40, 29.38, 29.2, 28.9, 28.7, 28.5, 27.7, 27.6, 25.3, 22.6, 14.0 ppm; HRMS (EI)  $m/z$  calcd. for  $\text{C}_{19}\text{H}_{27}\text{F} [\text{M}-\text{H}_2\text{O}]^+$ : 274.2097, found: 274.2094.

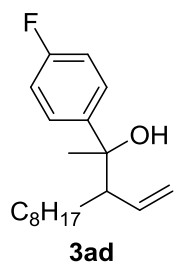

**Methyl 4-(2-Hydroxy-3-vinylundecan-2-yl)benzoate (3ae):** **1a** (120  $\mu$ L, 0.6 mmol, 3.0 equiv) and **2e** (36.9 mg, 0.2 mmol, 1.0 equiv) were employed as starting materials. Purification of the crude product by silica-gel column chromatography (eluent: hexane/ethyl acetate, 20:1 to 10:1) afforded **3ae** as colorless oil (46 mg, 139  $\mu$ mol, 66%, dr = 1.4:1). IR (neat): 3500, 2926, 2855, 1726, 1609, 1437, 1281, 1191, 1115, 713  $\text{cm}^{-1}$ ;  $^1\text{H}$  NMR (400 MHz,  $\text{CDCl}_3$ )  $\delta$ : 8.00 (dd,  $J$  = 8.6, 1.4 Hz, 2H), 7.51-7.45 (m, 2H), 5.63-5.49 (m, 1H), 5.23-5.06 (m, 2H), 3.91 (s, 3H), 2.30-2.22 (m, 1H), 1.51/1.52 (s, 3H), 1.36-1.03 (m, 14H), 0.85 (t,  $J$  = 6.8 Hz, 3H) ppm;  $^{13}\text{C}$  NMR (100 MHz,  $\text{CDCl}_3$ )  $\delta$ : 167.0, 152.6, 151.9, 138.4, 138.0, 129.2, 129.1, 128.5, 128.2, 126.0, 125.3, 119.2, 118.5, 76.1, 75.6, 56.5, 55.4, 52.0, 31.8, 29.38, 29.36, 29.31, 29.2, 28.9, 28.5, 28.4, 27.7, 27.6, 25.5, 22.6, 14.1 ppm; HRMS (EI)  $m/z$  calcd. for  $\text{C}_{21}\text{H}_{33}\text{O}_3$   $[\text{M}]^+$ : 333.2430, found: 333.2423.

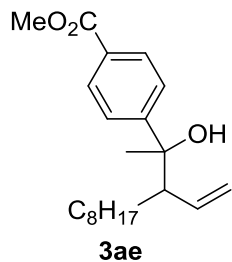

**2-(Naphthalen-2-yl)-3-vinylundecan-2-ol (3af):** **1a** (120  $\mu$ L, 0.6 mmol, 3.0 equiv) and **2f** (33.4 mg, 0.2 mmol, 1.0 equiv) were employed as starting materials. Purification of the crude product by silica-gel column chromatography (eluent: hexane/ethyl acetate, 50:1) afforded **3af** as colorless oil (40 mg, 123  $\mu$ mol, 63%, dr = 1.4:1). IR (neat): 3466, 2925, 2854, 1636, 1464, 1375, 1127, 913, 817, 749  $\text{cm}^{-1}$ ;  $^1\text{H}$  NMR (400 MHz,  $\text{CDCl}_3$ )  $\delta$ : 7.87-7.78 (m, 4H), 7.59-7.41 (m, 3H), 5.69-5.55 (m, 1H), 5.22-5.07 (m, 2H), 2.40-2.33 (m, 1H), 1.62/1.57 (s, 3H), 1.26-1.02 (m, 14H), 0.81 (t,  $J$  = 7.0 Hz, 3H) ppm;  $^{13}\text{C}$  NMR (100 MHz,  $\text{CDCl}_3$ )  $\delta$ : 144.7, 144.1, 138.9, 138.5, 133.0, 132.9, 132.3, 132.1, 128.2, 128.1, 127.5, 127.44, 127.41, 125.9, 125.8, 125.67, 125.58, 124.56, 124.54, 124.48, 123.8, 123.7, 119.0, 118.2, 76.3, 75.7, 56.4, 55.3, 31.79, 31.78, 29.44, 29.39, 29.3, 29.2, 29.1, 28.7, 28.5, 27.8, 27.7, 25.4, 22.6, 14.1 ppm; HRMS (EI)  $m/z$  calcd. for  $\text{C}_{23}\text{H}_{30}$   $[\text{M}-\text{H}_2\text{O}]^+$ : 306.2348, found: 306.2345.

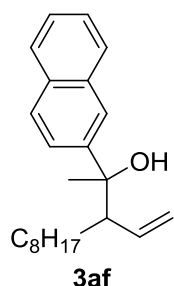

**3-Phenyl-4-vinyldodecan-3-ol (3ag):** **1a** (120  $\mu$ L, 0.6 mmol, 3.0 equiv) and **2g** (27  $\mu$ L, 0.2 mmol, 1.0 equiv) were employed as starting materials. Purification of the crude product by silica-gel column chromatography (eluent: hexane/ethyl acetate, 50:1) afforded **3ag** as colorless oil (36 mg, 125  $\mu$ mol, 62%, dr = 1.2:1). IR (neat): 3495, 2925, 2855, 1637, 1463, 1376, 1002, 968, 913, 701  $\text{cm}^{-1}$ ;  $^1\text{H}$  NMR (400 MHz,  $\text{CDCl}_3$ )  $\delta$ : 7.38-7.30 (m, 4H), 7.25-7.20 (m, 1H), 5.64-5.43 (m, 1H), 5.21-5.02 (m, 2H), 2.33-2.23 (m, 1H), 2.10-2.02/1.87-1.74 (m, 2H), 1.25-0.95 (m, 14H), 0.88-0.83 (m, 3H), 0.77/0.66 (t,  $J$  = 7.5 Hz, 3H) ppm;  $^{13}\text{C}$  NMR (100 MHz,  $\text{CDCl}_3$ )  $\delta$ : 144.7, 144.1, 138.9, 138.7, 127.8, 127.6, 126.5, 126.3, 126.2, 125.8, 117.98, 117.96, 78.6, 78.1, 55.8, 54.8, 33.5, 31.8, 31.0, 29.6, 29.5, 29.4, 29.33, 29.26, 29.2, 28.3, 27.88, 27.78, 27.6, 22.64, 22.62, 14.1, 7.63, 7.58 ppm; HRMS (EI)  $m/z$  calcd. for  $\text{C}_{20}\text{H}_{30}$   $[\text{M}-\text{H}_2\text{O}]^+$ : 270.2348, found: 270.2347.

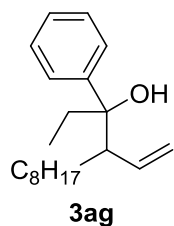

## (C-2) Examination of alkenes

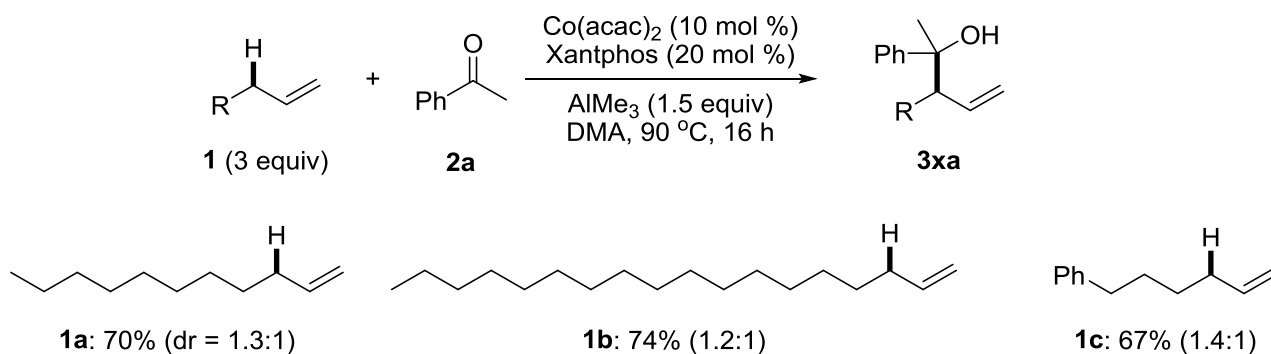

To an oven-dried test tube was placed  $\text{Co}(\text{acac})_2$  (5.2 mg, 20  $\mu\text{mol}$ , 10 mol %) and Xantphos (23.1 mg, 40  $\mu\text{mol}$ , 20 mol %) in DMA (2 mL). The resulting mixture was stirred at room temperature until the materials had been completely dissolved. After the solution had been cooled to 0 °C, it was stirred for 1 minute, and then  $\text{AlMe}_3$  (2 M in toluene, 0.15 mL, 0.3 mmol, 1.5 equiv) was added. The dark green solution was stirred for another 1 minute, and then alkene **1** (0.6 mmol, 3.0 equiv) was added followed by the addition of acetophenone (**2a**, 0.2 mmol, 23  $\mu\text{L}$ , 1.0 equiv). The resulting mixture was stirred at 90 °C for 16 h. After cooling the mixture to 0 °C, the reaction was quenched by 1 M HCl aq and extracted with ethyl acetate (3 times). The combined organic layer was washed with brine and dried over  $\text{Na}_2\text{SO}_4$ . After the solids had been filtered off, the solvent was removed under reduced pressure and the residue was dried under vacuum to afford the crude mixture. The approximate yield of **3xa** was determined at this stage using 1,1,2,2-tetrachloroethane ( $\delta$  = 6.1 ppm in  $\text{CDCl}_3$ , 2H) as an internal standard. If acetophenone (**2a**) remained,  $\text{NaBH}_4$  was added to convert it into the corresponding 1-phenylethyl alcohol, which could be easily separated from **3xa** by silica-gel column chromatography. It was then purified by silica-gel column chromatography to afford the product **3xa**.

**2-Phenyl-3-vinyloctadecan-2-ol (3ba):** **1b** (190  $\mu\text{L}$ , 0.6 mmol, 3.0 equiv) and **2a** (24  $\mu\text{L}$ , 0.2 mmol, 1.0 equiv) were employed as starting materials. Purification of the crude product by silica-gel column chromatography (eluent: hexane/ethyl acetate, 50:1) afforded **3ba** as colorless oil (58 mg, 155  $\mu\text{mol}$ , 74%, dr = 1.2:1). IR (neat): 3467, 2924, 2853, 1637, 1465, 1375, 1065, 913, 759, 700  $\text{cm}^{-1}$ ;  $^1\text{H}$  NMR (400 MHz,  $\text{CDCl}_3$ )  $\delta$ : 7.44-7.21 (m, 5H), 5.64-5.52 (m, 1H), 5.21-5.05 (m, 2H), 2.29-2.23 (m, 1H), 1.54/1.51 (s, 3H), 1.34-1.02 (m, 28H), 0.88 (t,  $J$  = 7.0 Hz, 3H) ppm;  $^{13}\text{C}$  NMR (100 MHz,  $\text{CDCl}_3$ )  $\delta$ : 147.2, 146.5, 138.9, 138.6, 127.84, 127.76, 126.6, 126.3, 126.0, 125.2, 118.8, 118.1, 76.0, 75.5, 56.6, 55.6, 31.9, 29.7, 29.64, 29.60, 29.57, 29.52, 29.49, 29.48, 29.41, 29.38, 29.35, 28.9, 28.6, 28.5, 27.8, 27.7, 25.4, 22.7, 14.1 ppm; HRMS (EI)  $m/z$  calcd. for  $\text{C}_{26}\text{H}_{42} [\text{M}-\text{H}_2\text{O}]^+$ : 354.3287, found: 354.3282.

**2,6-Diphenyl-3-vinylhexan-2-ol (3ca):** **1c** (96 mg, 0.6 mmol, 3.0 equiv) and **2a** (23  $\mu\text{L}$ , 0.2 mmol, 1.0 equiv) were employed as starting materials. Purification of the crude product by silica-gel column chromatography (eluent: hexane/ethyl acetate, 40:1 to 10:1) afforded **3ca** as colorless oil (36 mg, 140  $\mu\text{mol}$ , 67%, dr = 1.4:1). IR (neat): 3466, 3025, 2930, 2857, 1602, 1494, 1446, 914, 749, 700  $\text{cm}^{-1}$ ;  $^1\text{H}$  NMR (400 MHz,  $\text{CDCl}_3$ )  $\delta$ : 7.44-7.04 (m, 1H), 5.66-5.51 (m, 1H), 5.21-5.05 (m, 2H), 2.56-2.49 (m,

1H), 2.43-2.36 (m, 1H), 2.35-2.29 (m, 1H), 1.54/1.51 (s, 3H), 1.47-1.24 (m, 4H) ppm;  $^{13}\text{C}$  NMR (100 MHz,  $\text{CDCl}_3$ )  $\delta$ : 147.0, 146.4, 142.6, 142.5, 138.6, 138.3, 128.3, 128.2, 127.9, 127.8, 126.7, 126.4, 125.9, 125.5, 125.2, 119.1, 118.3, 76.0, 75.5, 56.5, 55.5, 35.7, 35.6, 29.8, 29.7, 28.9, 28.4, 28.2, 25.5 ppm; HRMS (ESI)  $m/z$  calcd. for  $\text{C}_{20}\text{H}_{24}\text{ONa}$   $[\text{M}+\text{Na}]^+$ : 303.1719, found: 303.1727.



(D) Copies of  $^1\text{H}$  NMR and  $^{13}\text{C}$  NMR spectra

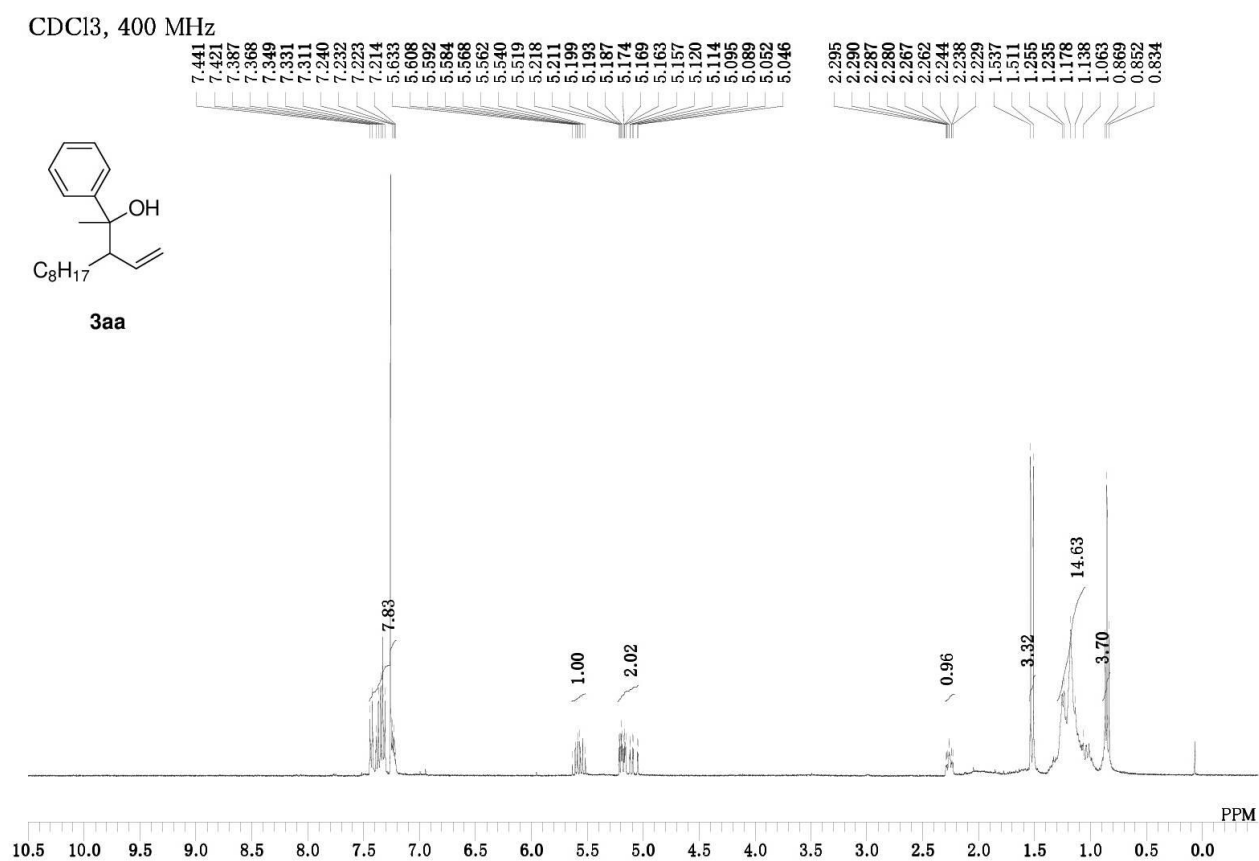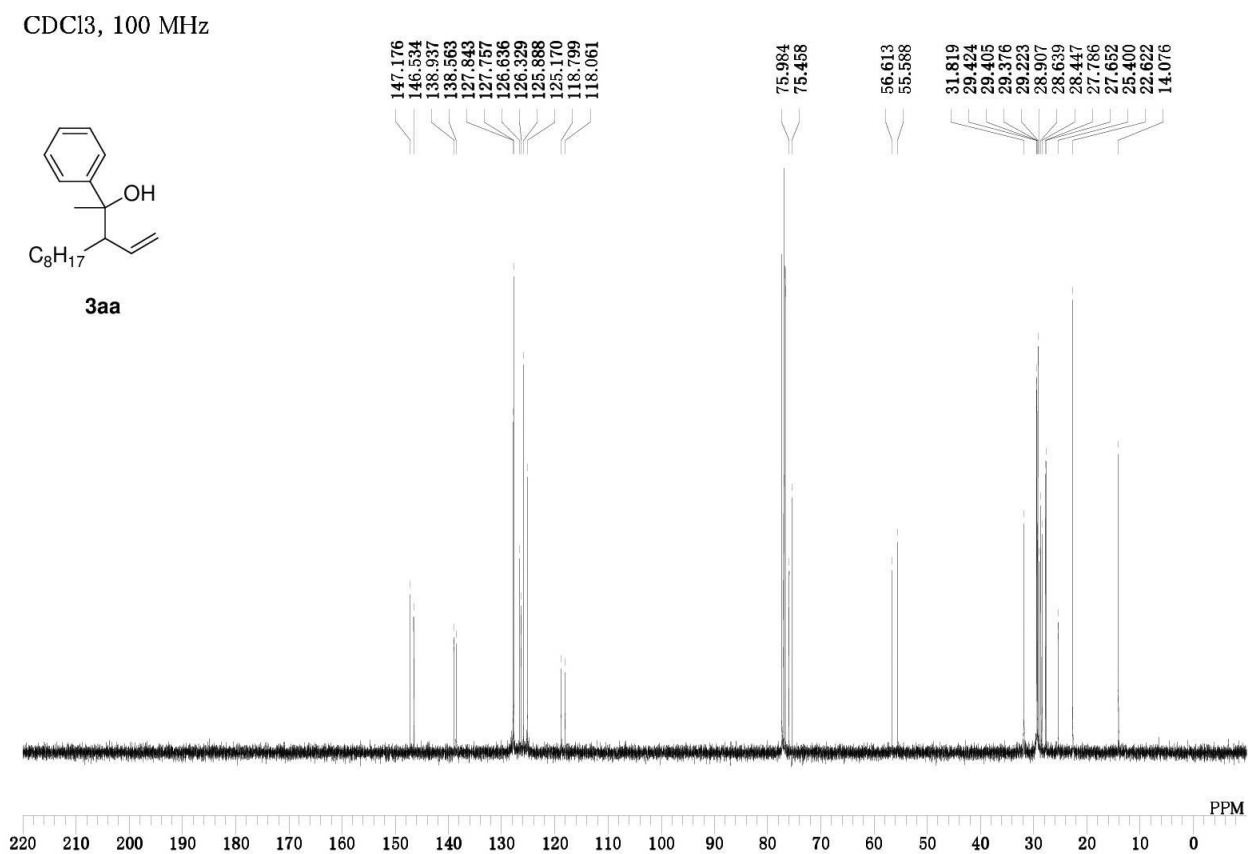

CDCl<sub>3</sub>, 400 MHz

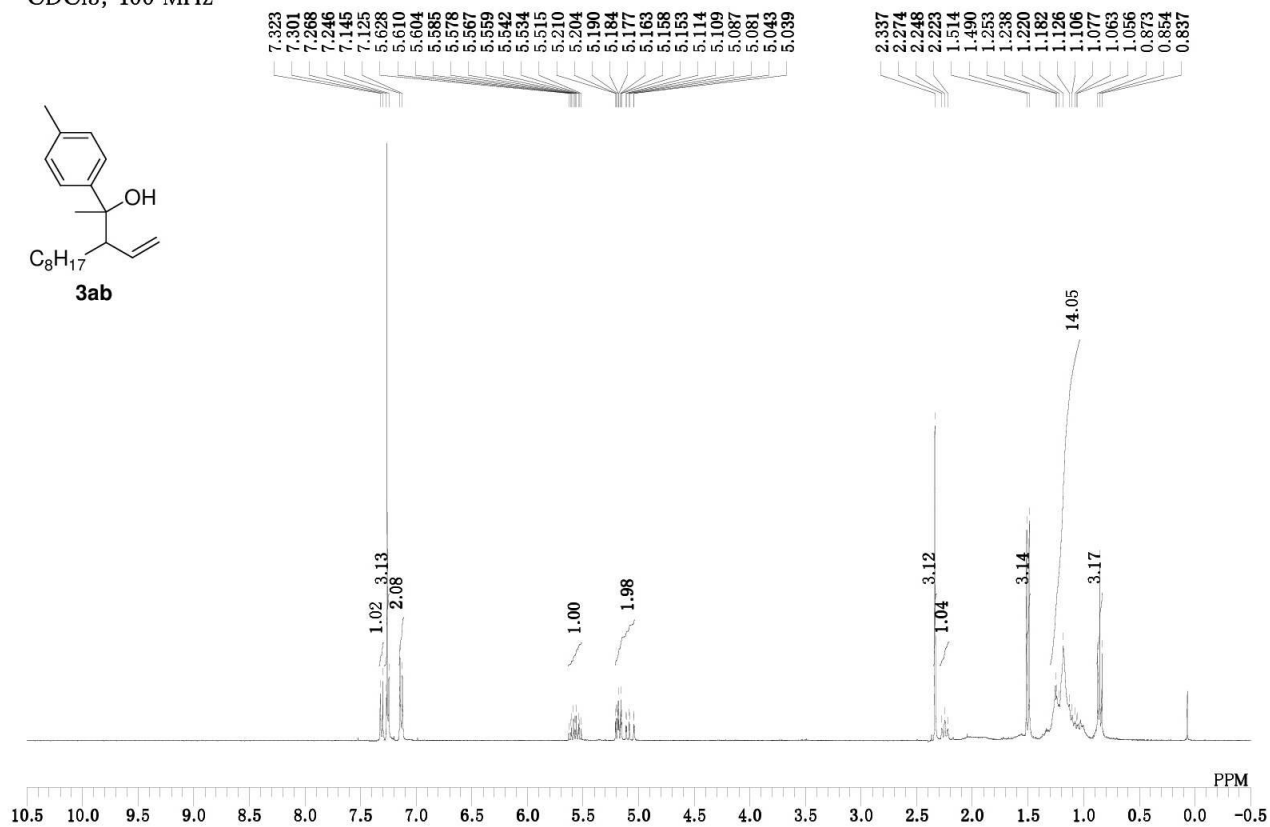

CDCl<sub>3</sub>, 100 MHz

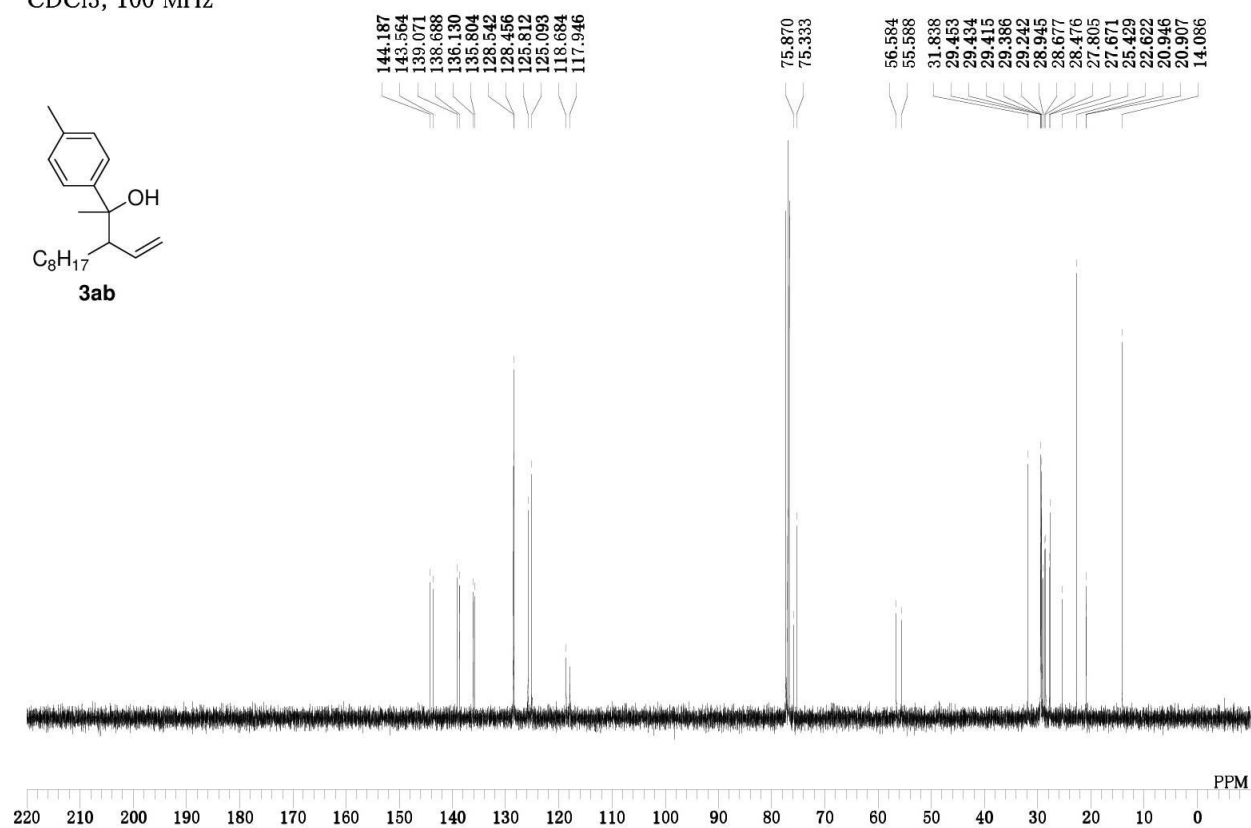

CDCl<sub>3</sub>, 400 MHz

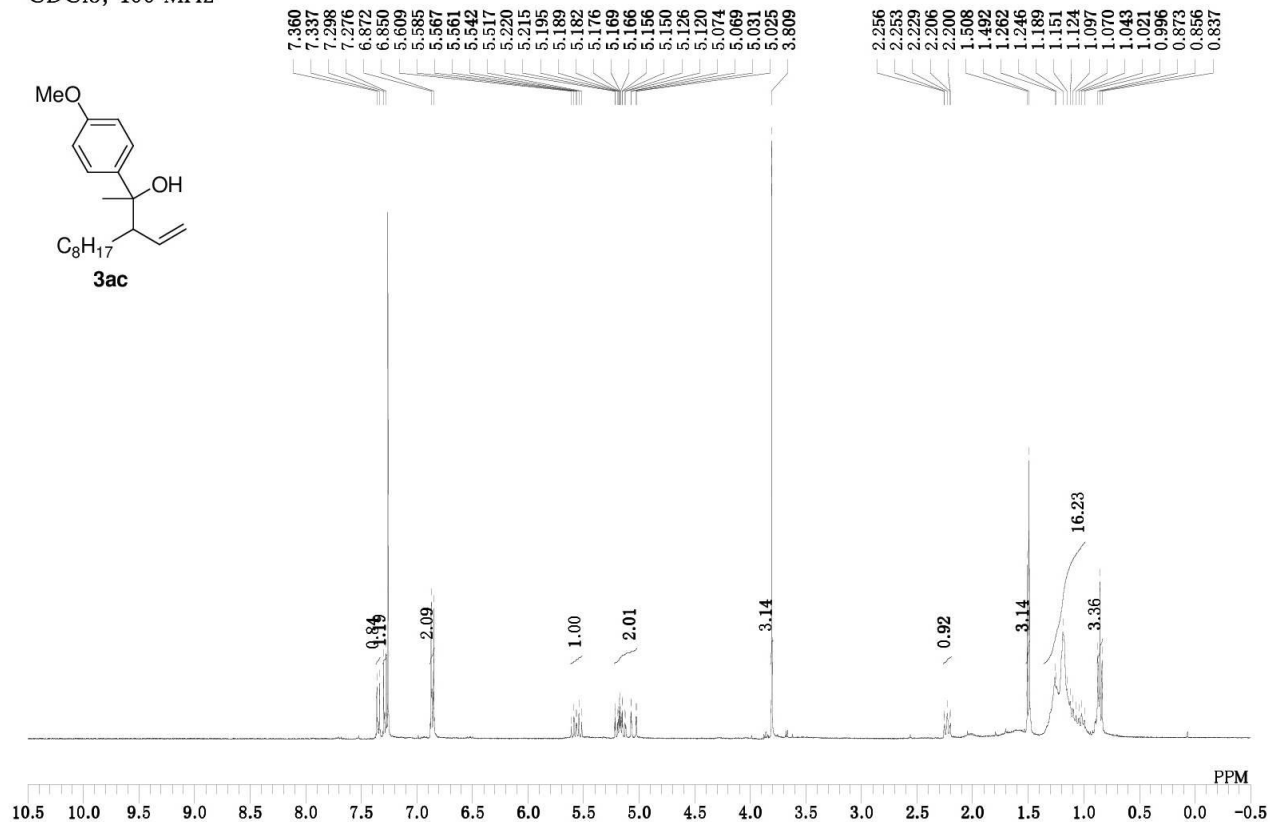

CDCl<sub>3</sub>, 100 MHz

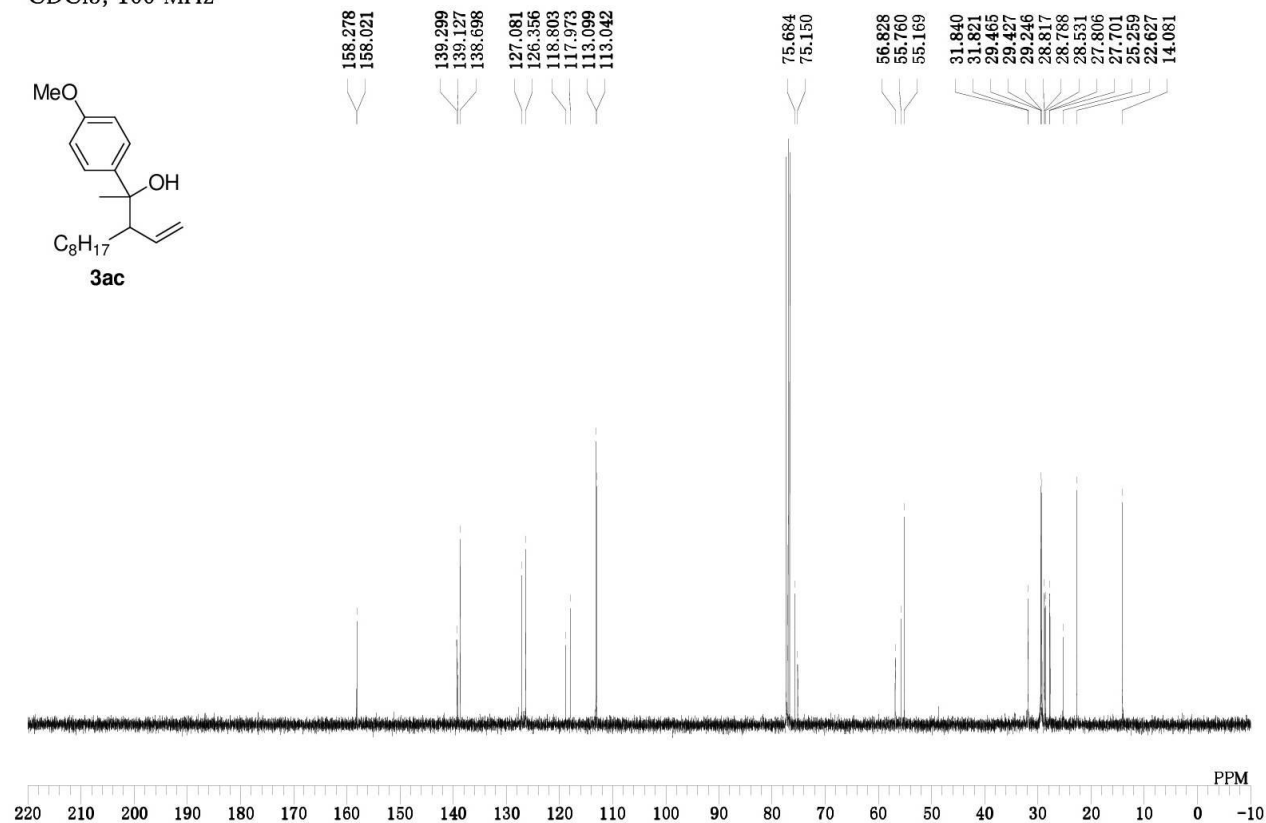

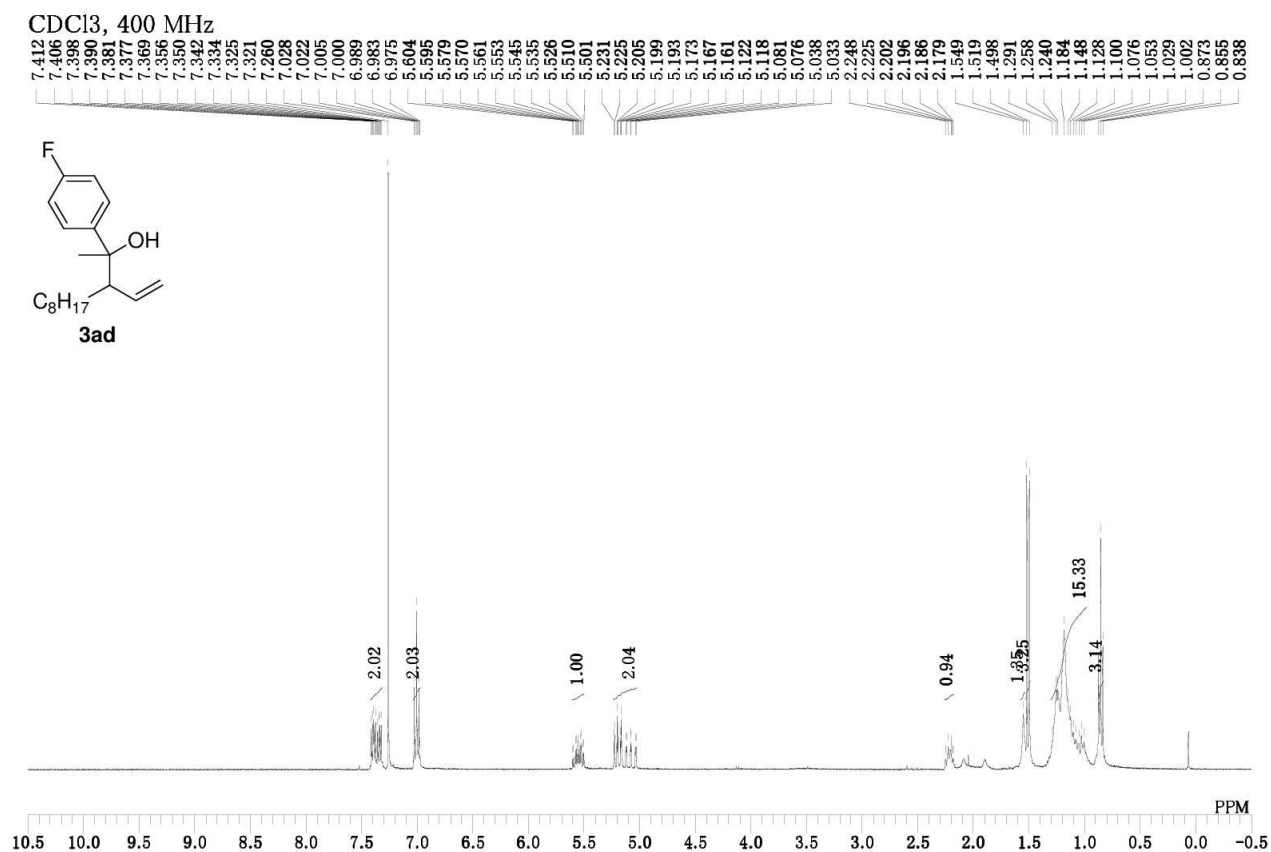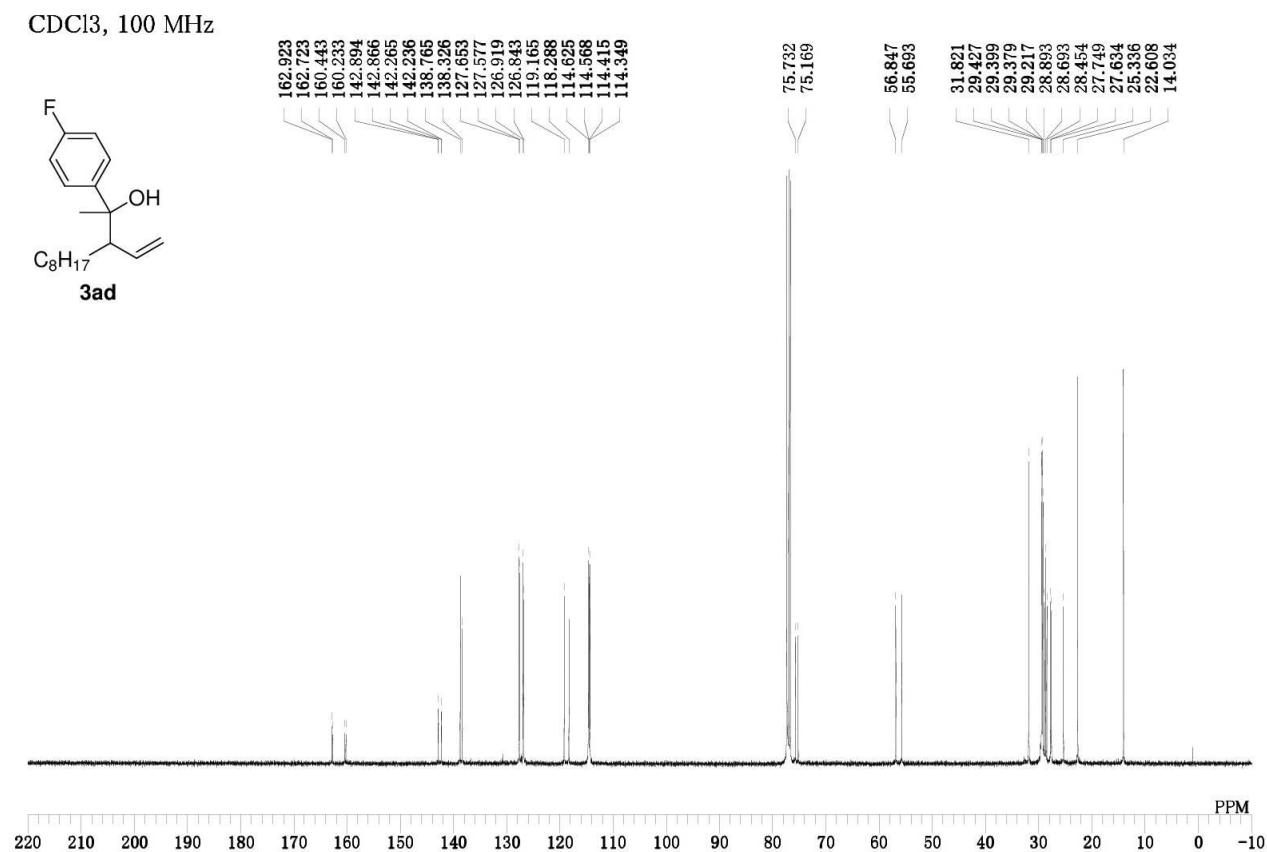

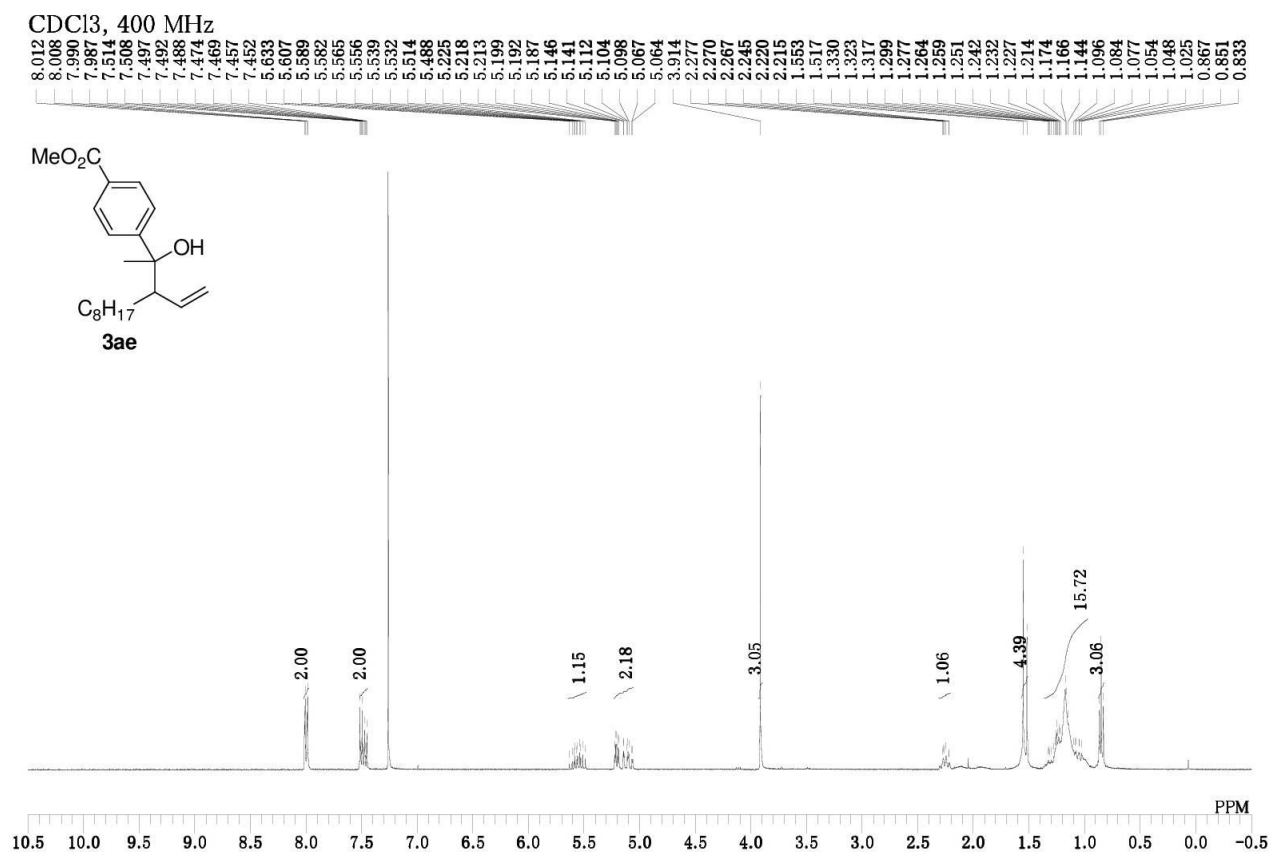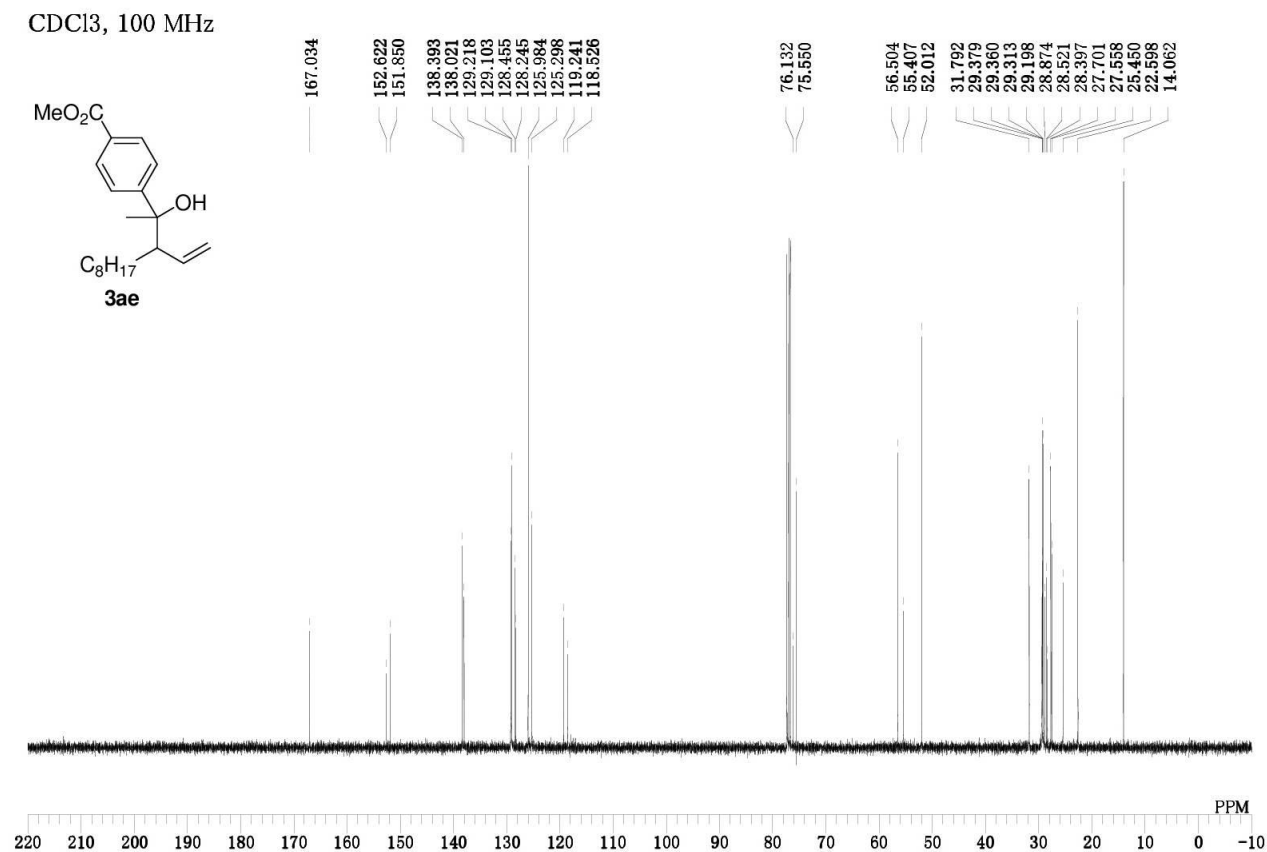

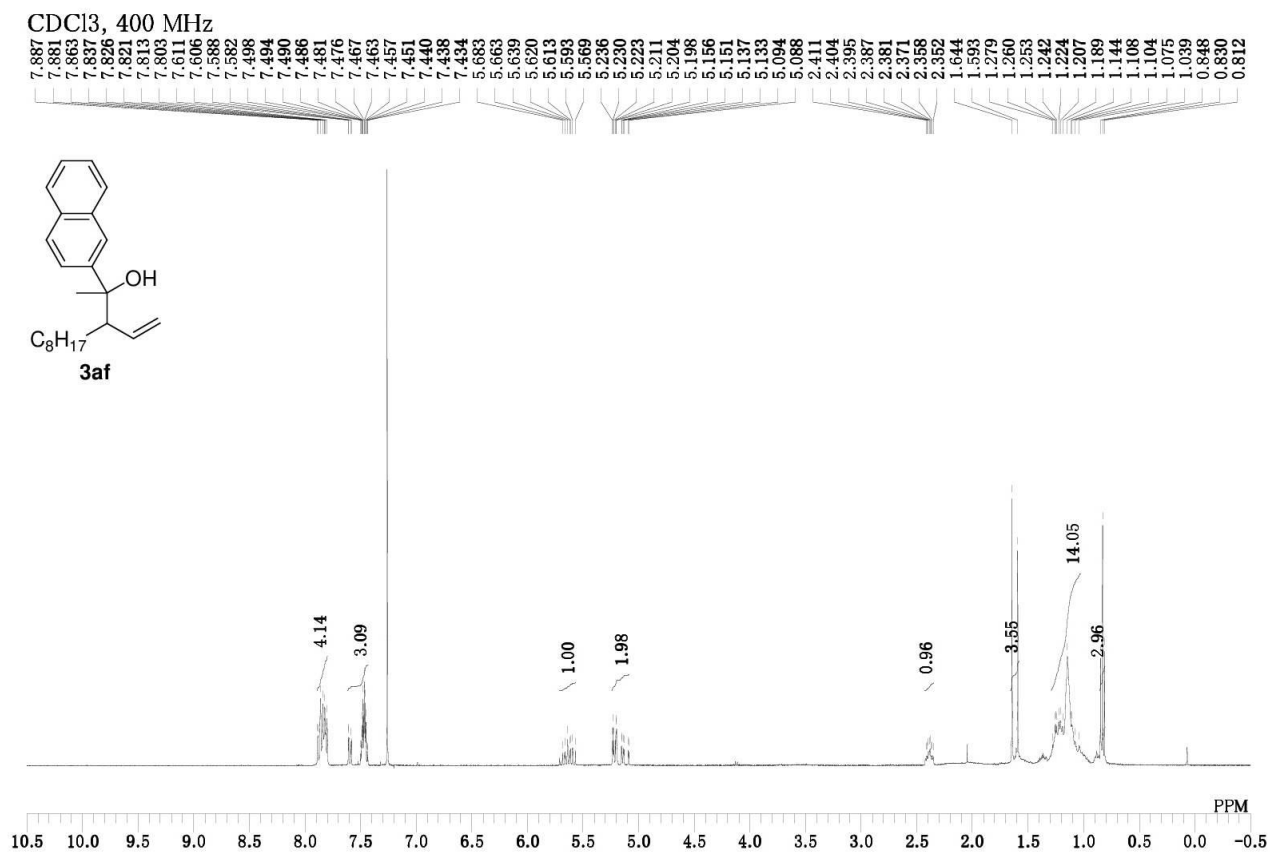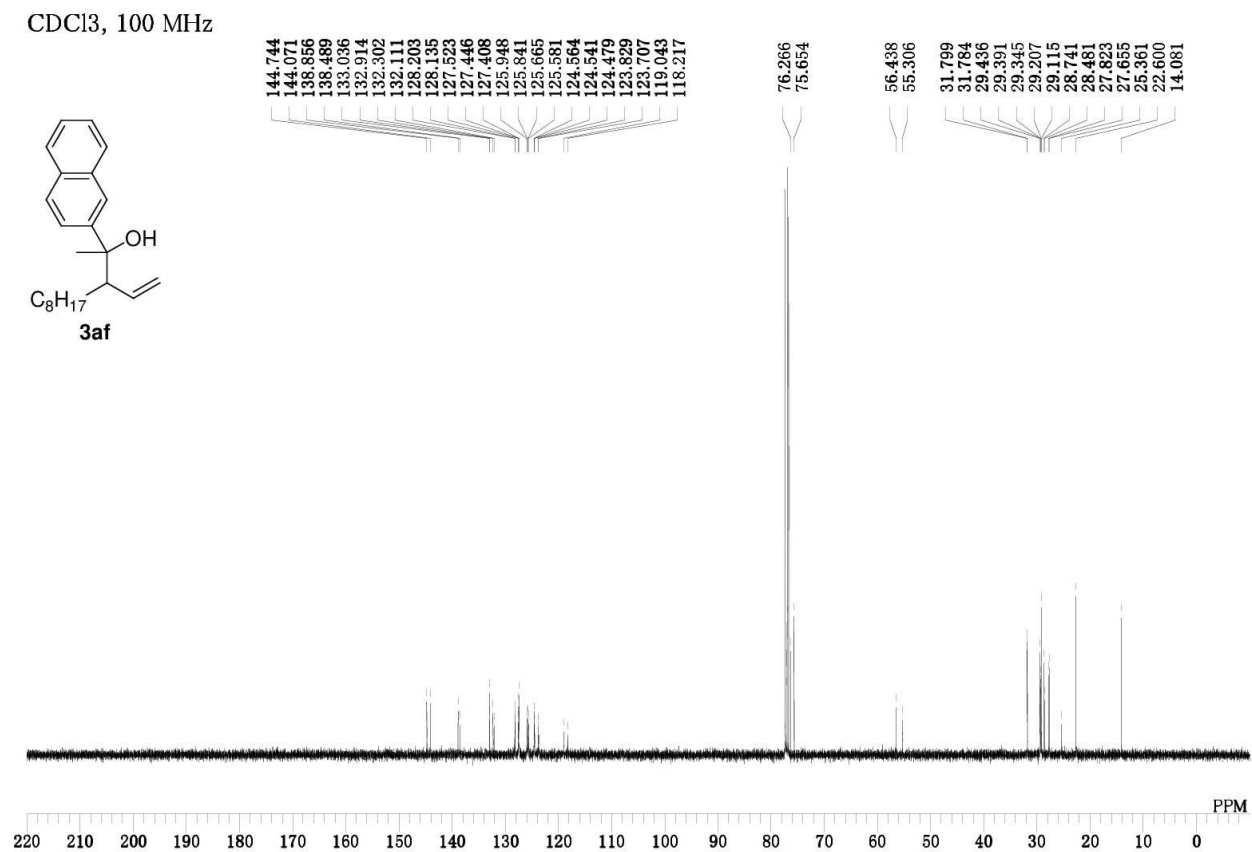

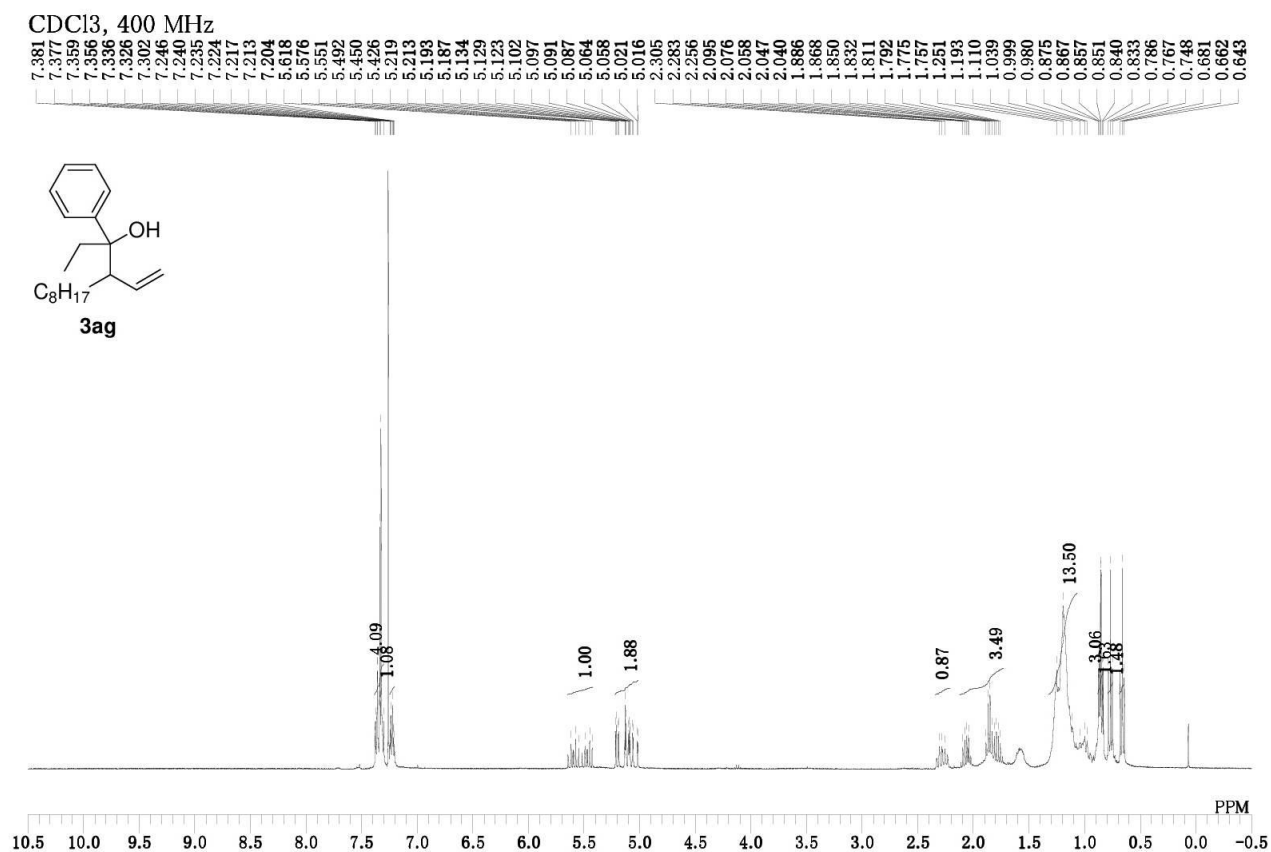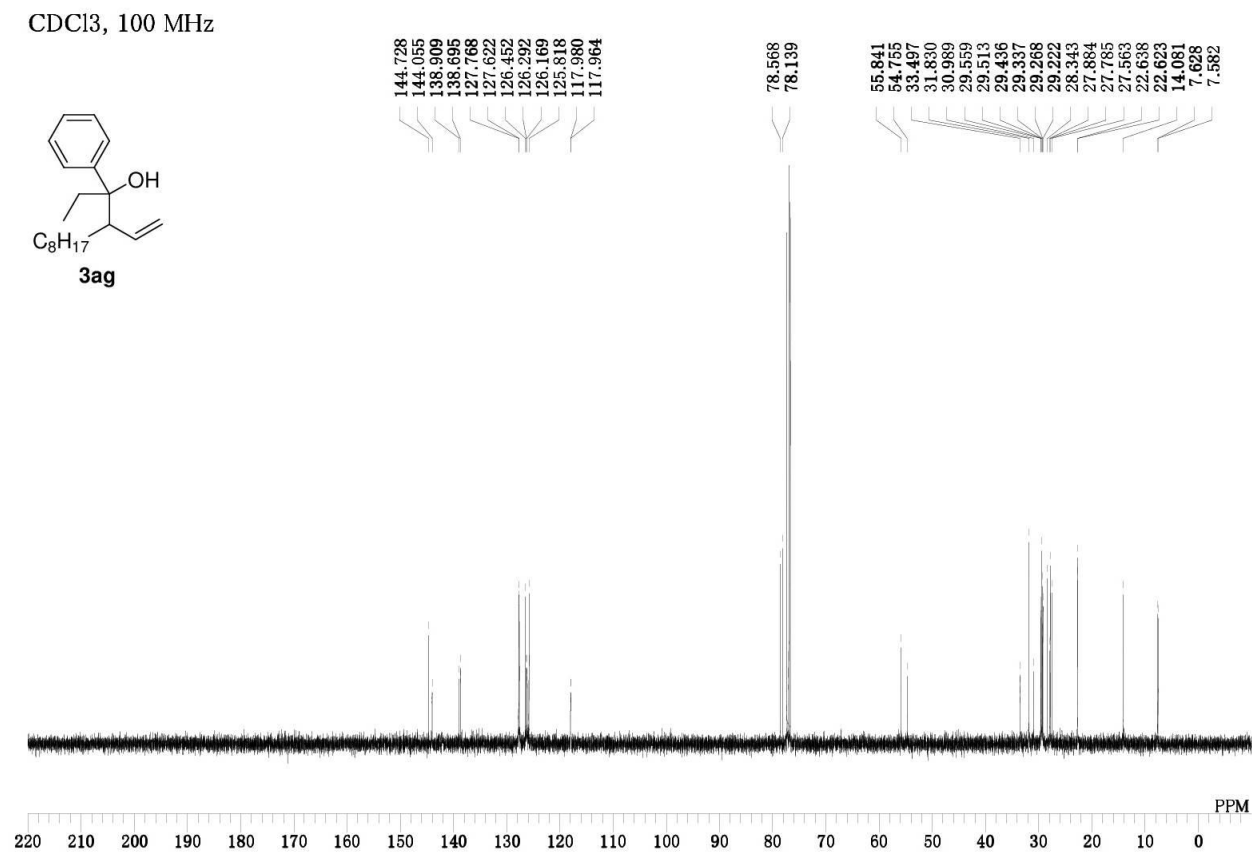

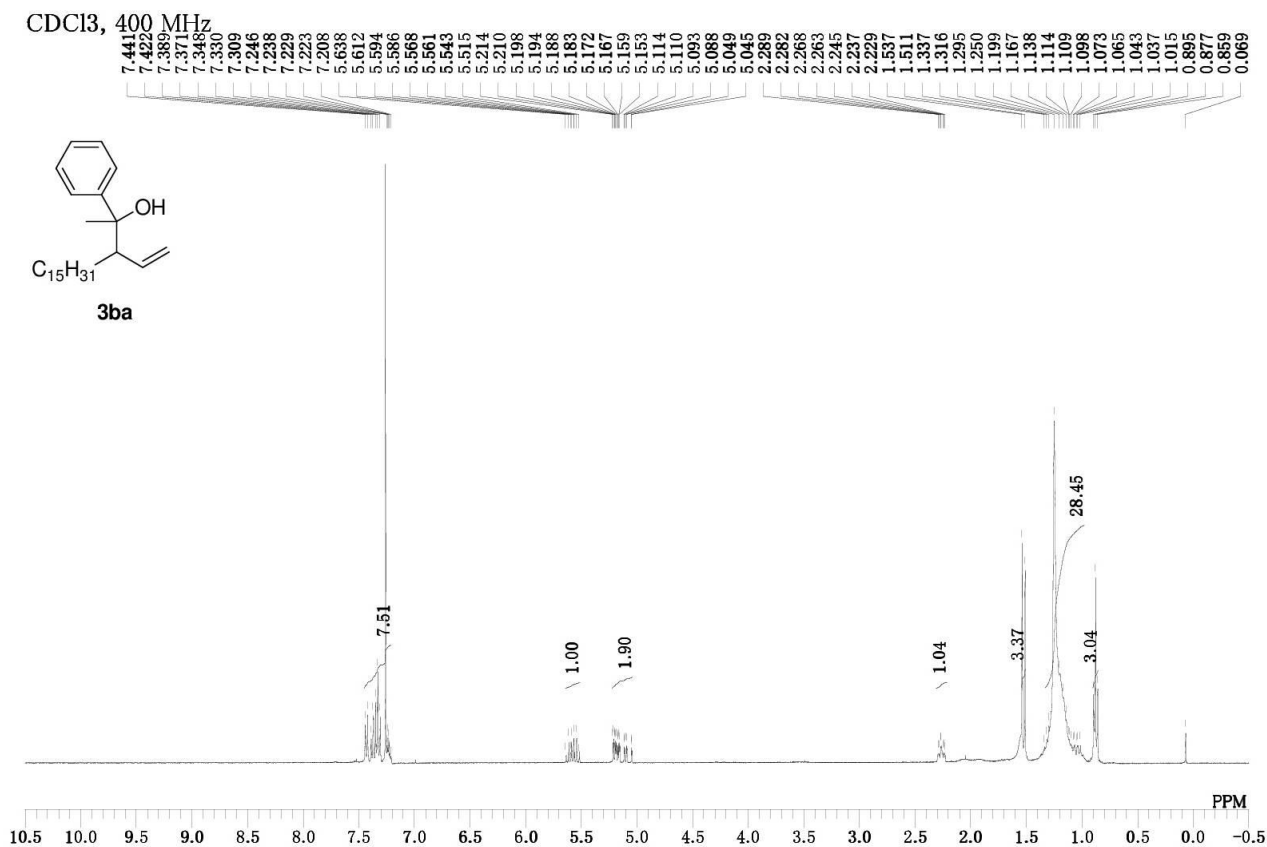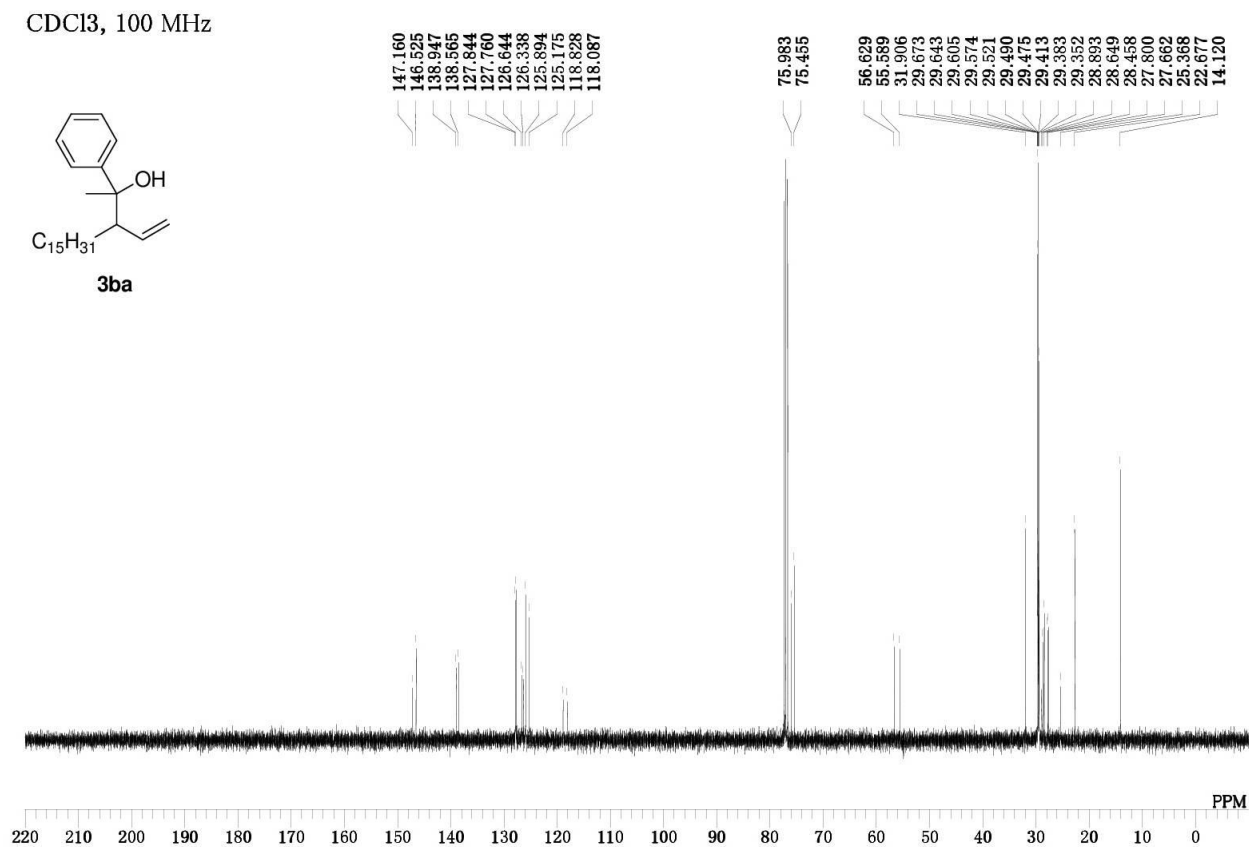



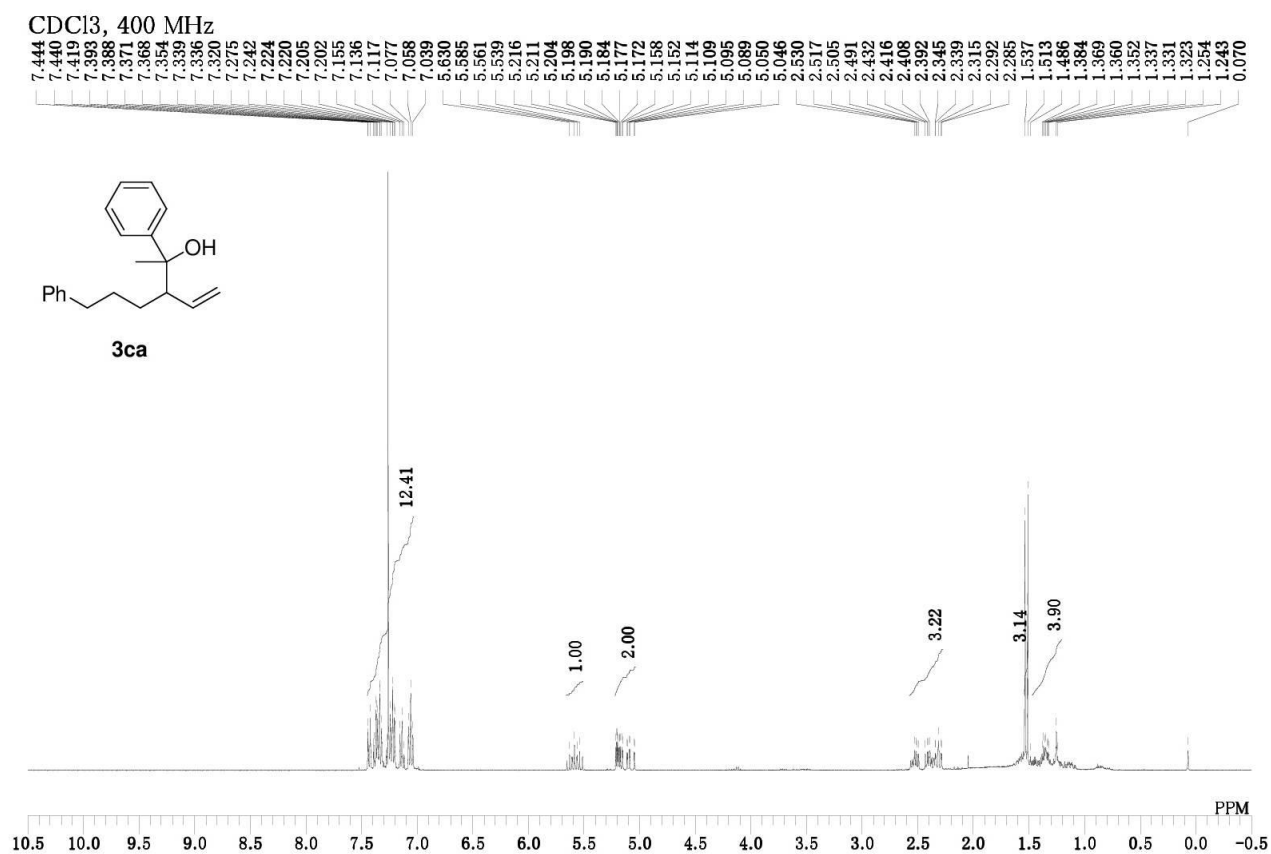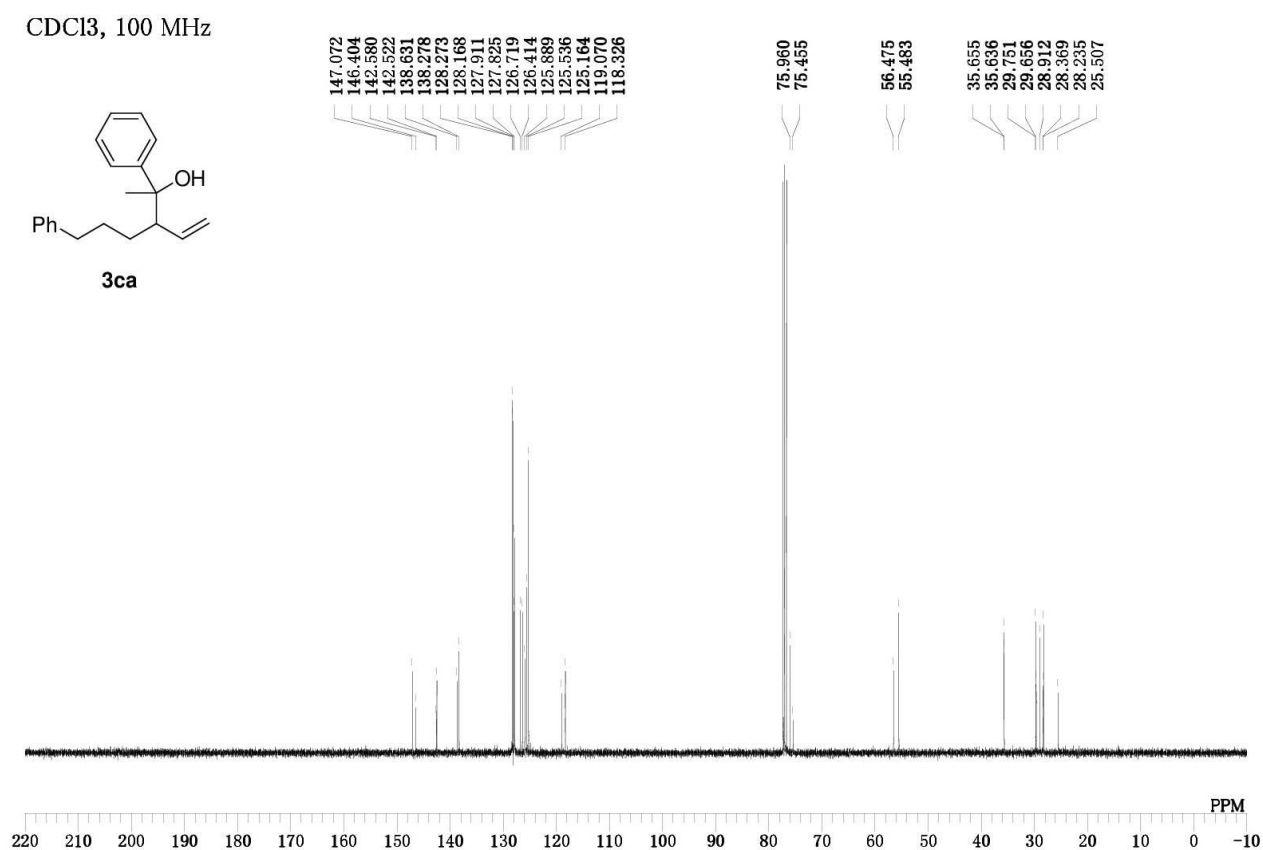

Supplement: Additional file 1 [file 1860-5397-14-176-S1.pdf]
